# Supplementary material
Source: PubMed Central journal article supplement (PMC516556)

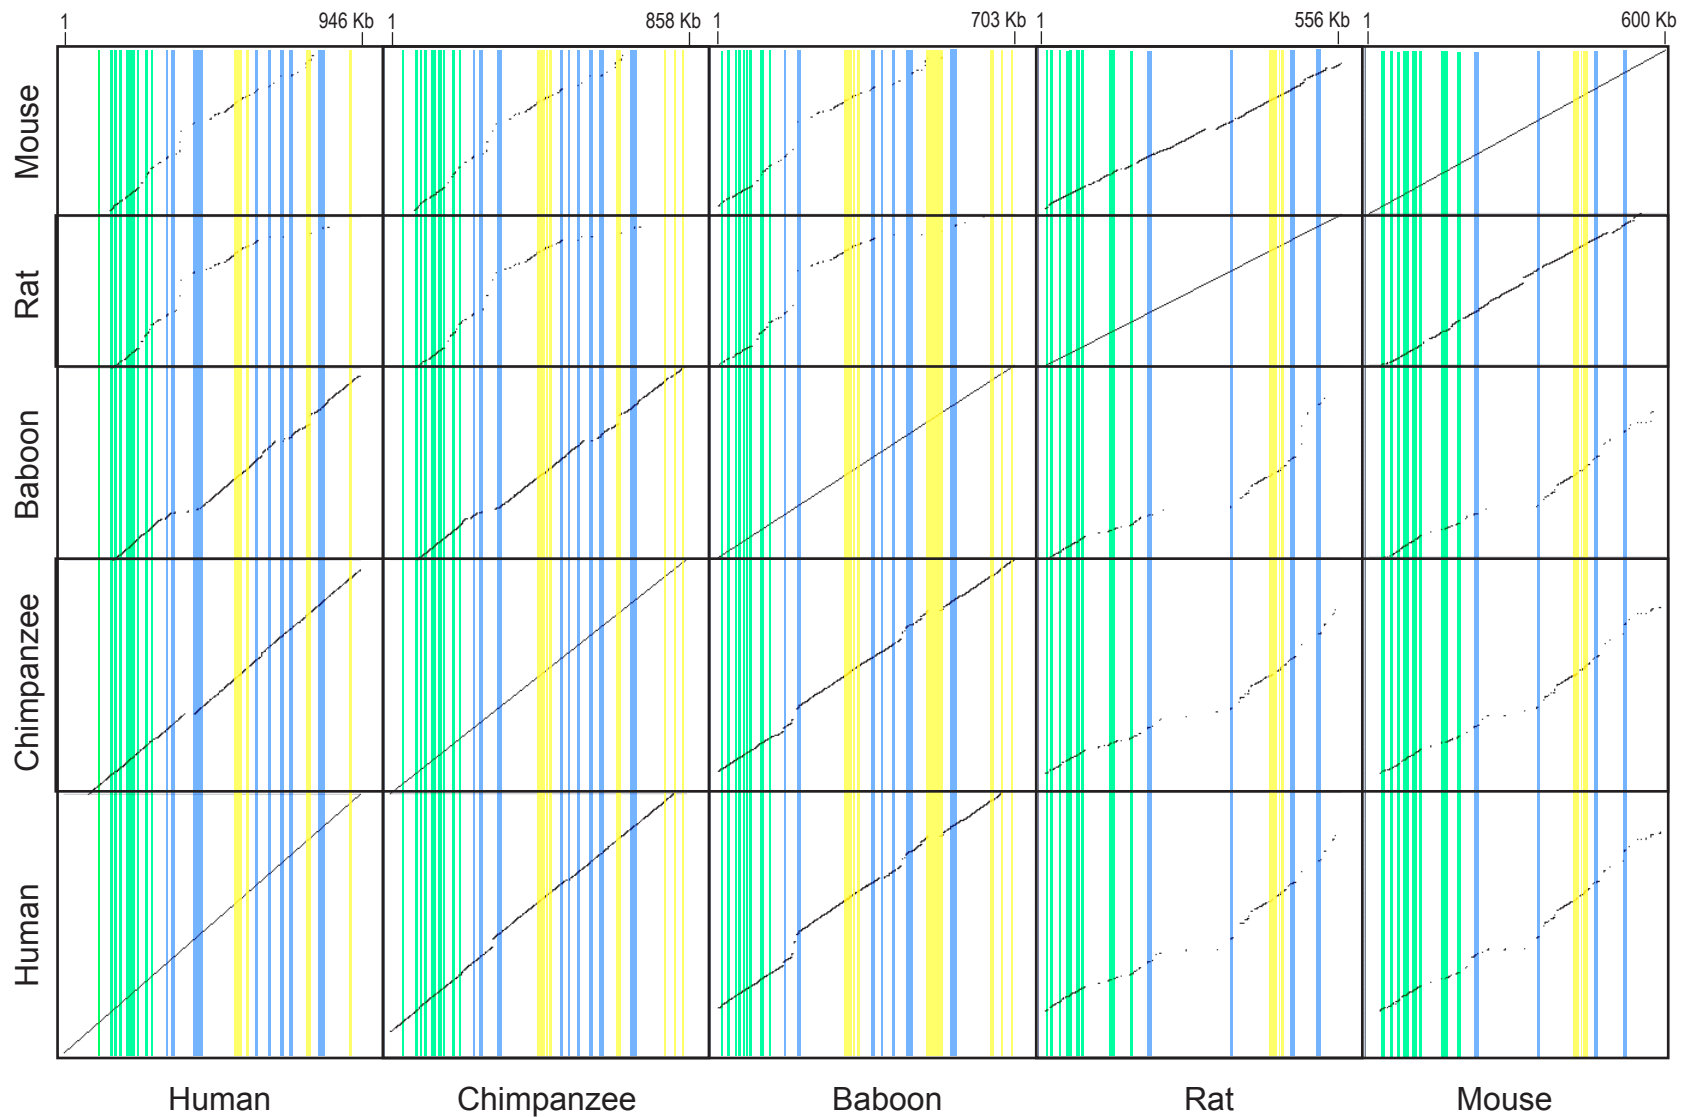

Supplement: pnas_101_36_13251__2.pdf [file pnas_101_36_13251__2.pdf]

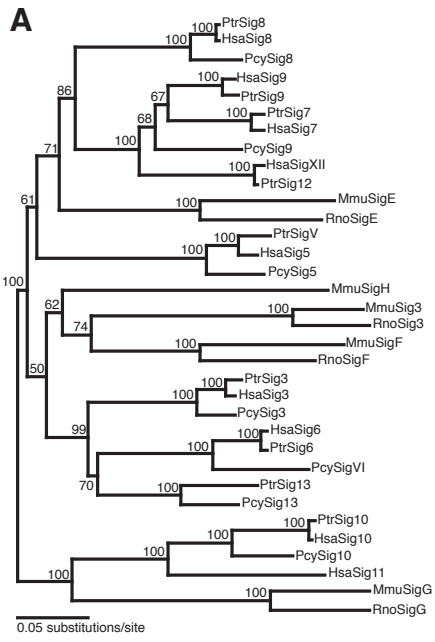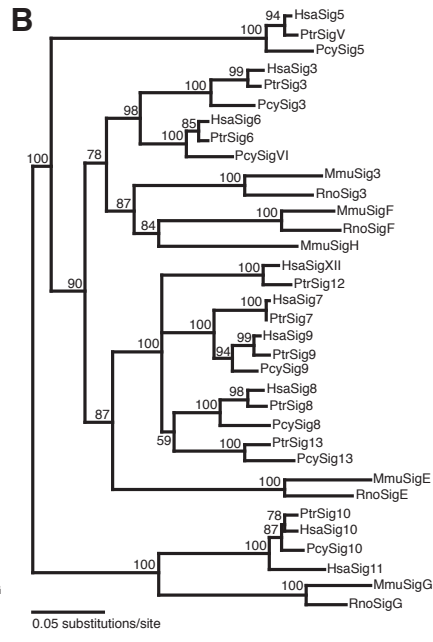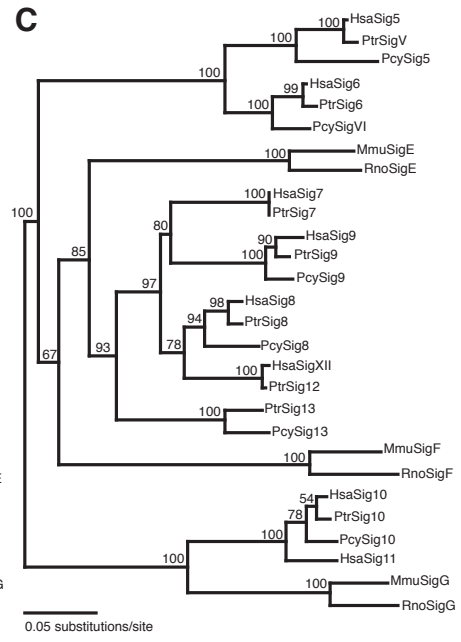

Supplement: pnas_101_36_13251__3.pdf [file pnas_101_36_13251__3.pdf]

**A**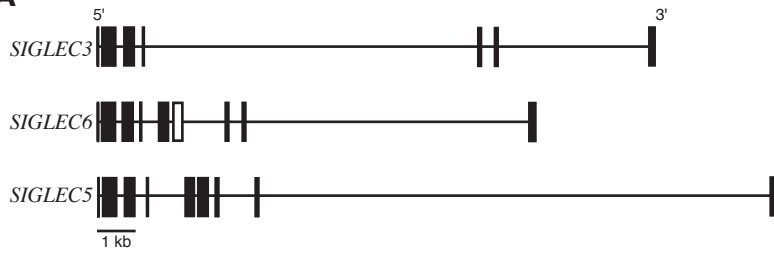**B**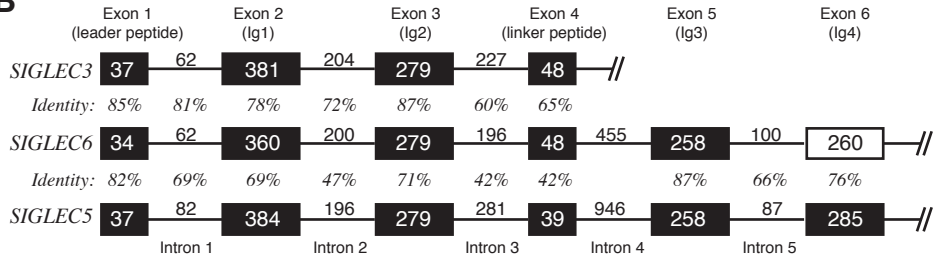**C**Scenario 1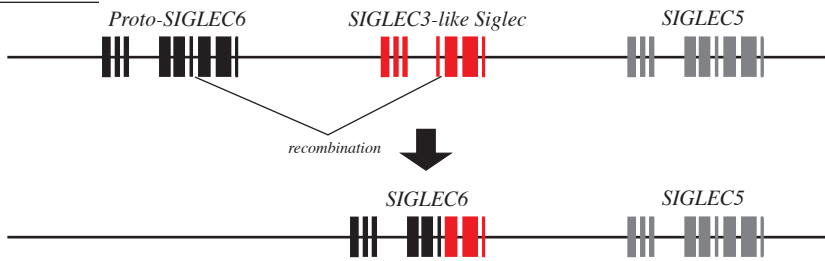Scenario 2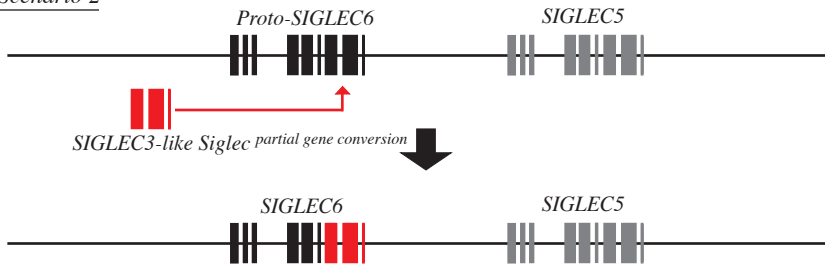

Supplement: pnas_101_36_13251__4.pdf [file pnas_101_36_13251__4.pdf]

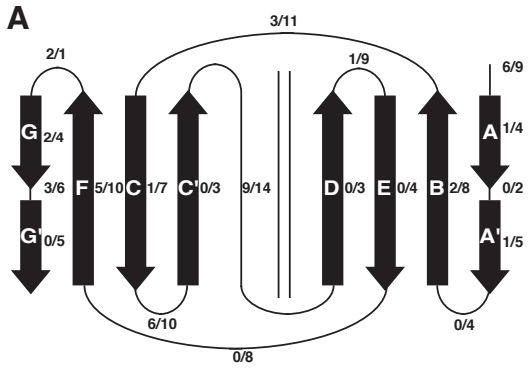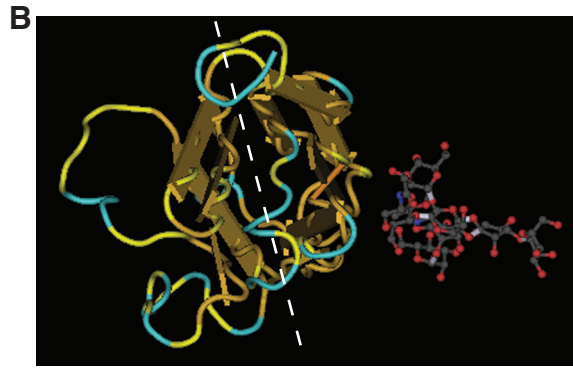

Supplement: pnas_101_36_13251__6.pdf [file pnas_101_36_13251__6.pdf]
